# Supplementary material for: Network design for quantifying urban CO 2 emissions: Assessing trade-offs between precision and network density
Source: Copernicus journal article supplement (doi:10.5194/acp-2016-355), 2016-05-24
Supplement: Supplementary file 1 [file acp-2016-355-supplement.pdf]

# Network design for quantifying urban CO<sub>2</sub> emissions: Assessing trade-offs between precision and network density

A. J. Turner, A. A. Shusterman, B. C. McDonald,  
V. Teige, R. A. Harley, & R. C. Cohen

April 25, 2016

## Contents

|          |                                                    |           |
|----------|----------------------------------------------------|-----------|
| <b>1</b> | <b>WRF-STILT</b>                                   | <b>2</b>  |
| <b>2</b> | <b>Prior error covariance matrix</b>               | <b>3</b>  |
| <b>3</b> | <b>Implementation of the error metrics</b>         | <b>6</b>  |
| 3.1      | Area Source . . . . .                              | 6         |
| 3.2      | Line Source . . . . .                              | 7         |
| 3.3      | Point Source . . . . .                             | 7         |
| <b>4</b> | <b>Relating the error metric to the flux error</b> | <b>7</b>  |
| <b>5</b> | <b>Sensitivity tests</b>                           | <b>7</b>  |
| 5.1      | Sensitivity to domain size . . . . .               | 8         |
| 5.2      | Sensitivity to systematic biases . . . . .         | 8         |
| 5.3      | Sensitivity to observational frequency . . . . .   | 8         |
| <b>6</b> | <b>Model selection criterion</b>                   | <b>11</b> |
| <b>A</b> | <b>Tables of Model Selection Criterion</b>         | <b>14</b> |

# 1 WRF-STILT

We use meteorological fields from the Weather Research and Forecasting (WRF v3.5, [1]) model, a mesoscale meteorological model, to drive the Stochastic Time-Inverted Lagrangian Transport (STILT [2]) model, a Lagrangian particle dispersion model. The coupling between the WRF and STILT models (WRF-STILT) was developed by Nehrkorn *et al.*[3]. Meteorological fields were generated at four gridded horizontal resolutions (27, 9, 3, and 1 km) in a one-way nested arrangement centered around California's Bay Area (see Fig. 1). All WRF domains had 50 vertical levels (see caption of Fig. 1). Initial and lateral boundary conditions were provided by the North American Regional Reanalysis[4]. Overlapping 30-hour forecasts were initialized every 24 hours, at 00 UTC, and the first 6 hours of each forecast were discarded to allow for model spinup. Grid nudging was used in the outer-most domain. WRF simulations used the MYJ planetary boundary layer scheme and the 5-layer SLAB land surface model[1].

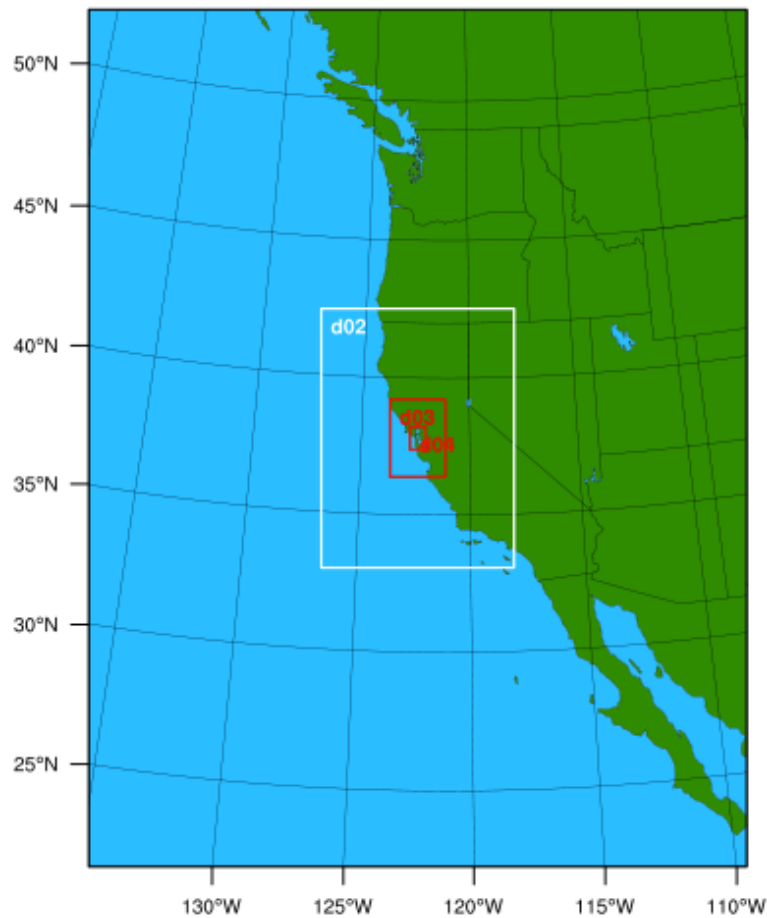

Figure 1: **WRF domains.** Plot window covers the outermost domain (d01), d02 covers the majority of California, d03 covers a section of Northern California, and d04 covers California's Bay Area. Vertical levels: 28, 97, 190, 309, 460, 652, 887, 1110, 1301, 1497, 1697, 1994, 2391, 2791, 3195, 3602, 4013, 4427, 4845, 5266, 5691, 6121, 6554, 6991, 7433, 7879, 8330, 8785, 9246, 9711, 10182, 10657, 11139, 11626, 12119, 12618, 13124, 13636, 14155, 14681, 15215, 15757, 16304, 16853, 17401, 17950, 18498, 19046, 19594, and 20141 m.



The STILT model advects an ensemble of 500 particles 3-days backward in time from the spatio-temporal receptor points using the meteorological fields from WRF. Fig. 2 shows some example particle trajectories. These trajectories can be used to construct measurement footprints (see main text).

## 2 Prior error covariance matrix

Following Meirink *et al.*[5], Singh *et al.*[6], and Yadav & Michalak[7], we express our prior error covariance matrix ( $\mathbf{B}$ ;  $m \times m$ ) as a Kronecker product of a temporal covariance matrix ( $\mathbf{D}$ ;  $n_t \times n_t$ ) and a spatial covariance matrix ( $\mathbf{E}$ ;  $n_x n_y \times n_x n_y$ ), in our application,  $m = 2, 133, 120$ ,  $n_t = 240$ ,  $n_x = 88$ , and  $n_y = 101$ . This allows us to write  $\mathbf{B}$  as:

$$\mathbf{B} = \mathbf{D} \otimes \mathbf{E} = \begin{pmatrix} d_{(1,1)}\mathbf{E} & \cdots & d_{(1,n_t)}\mathbf{E} \\ \vdots & \ddots & \vdots \\ d_{(n_t,1)}\mathbf{E} & \cdots & d_{(n_t,n_t)}\mathbf{E} \end{pmatrix} \quad (1)$$

where  $\otimes$  is the Kronecker product. Our implementation is adapted from Yadav & Michalak[7].

The temporal and spatial covariance matrices can be expressed in terms of correlation matrices and diagonal variance matrices:

$$\mathbf{\Sigma} = \mathbf{V}^{1/2}\mathbf{M}\mathbf{V}^{1/2} \quad (2)$$

where  $\mathbf{\Sigma}$  is an  $p \times p$  covariance matrix,  $\mathbf{M}$  is an  $p \times p$  correlation matrix, and  $\mathbf{V}$  is an  $p \times p$  diagonal matrix of variances:

$$\mathbf{V} = \begin{pmatrix} \sigma_1^2 & 0 & \cdots & 0 \\ 0 & \sigma_2^2 & \ddots & 0 \\ \vdots & \ddots & \ddots & 0 \\ 0 & \cdots & 0 & \sigma_p^2 \end{pmatrix} \quad (3)$$

Thus, the temporal covariance matrix is  $\mathbf{D} = \mathbf{V}_t^{1/2}\mathbf{M}_t\mathbf{V}_t^{1/2}$  and the spatial covariance matrix is  $\mathbf{E} = \mathbf{V}_s^{1/2}\mathbf{M}_s\mathbf{V}_s^{1/2}$ .

We construct  $\mathbf{V}_t$ ,  $\mathbf{V}_s$ ,  $\mathbf{M}_t$ , and  $\mathbf{M}_s$  from the BEACO<sub>2</sub>N emission inventory described in the main text.  $\mathbf{X}$  is an  $n_x \times n_y \times n_t$  third-order tensor of CO<sub>2</sub> emissions from the BEACO<sub>2</sub>N emission inventory.  $\mathbf{V}_t$  and  $\mathbf{V}_s$  are constructed as:

$$\mathbf{V}_t = f_\sigma \cdot \begin{pmatrix} \text{var}(\mathbf{X}_{(:, :, 1)}) & 0 & \cdots & 0 \\ 0 & \text{var}(\mathbf{X}_{(:, :, 2)}) & \ddots & 0 \\ \vdots & \ddots & \ddots & 0 \\ 0 & \cdots & 0 & \text{var}(\mathbf{X}_{(:, :, n_t)}) \end{pmatrix} \quad (4)$$

$$\mathbf{V}_s = f_\sigma \cdot \begin{pmatrix} \text{var}(\mathbf{X}_{(1,1,:)}) & 0 & \cdots & 0 \\ 0 & \text{var}(\mathbf{X}_{(1,2,:)}) & \ddots & 0 \\ \vdots & \ddots & \ddots & 0 \\ 0 & \cdots & 0 & \text{var}(\mathbf{X}_{(n_x, n_y, :)}) \end{pmatrix} \quad (5)$$

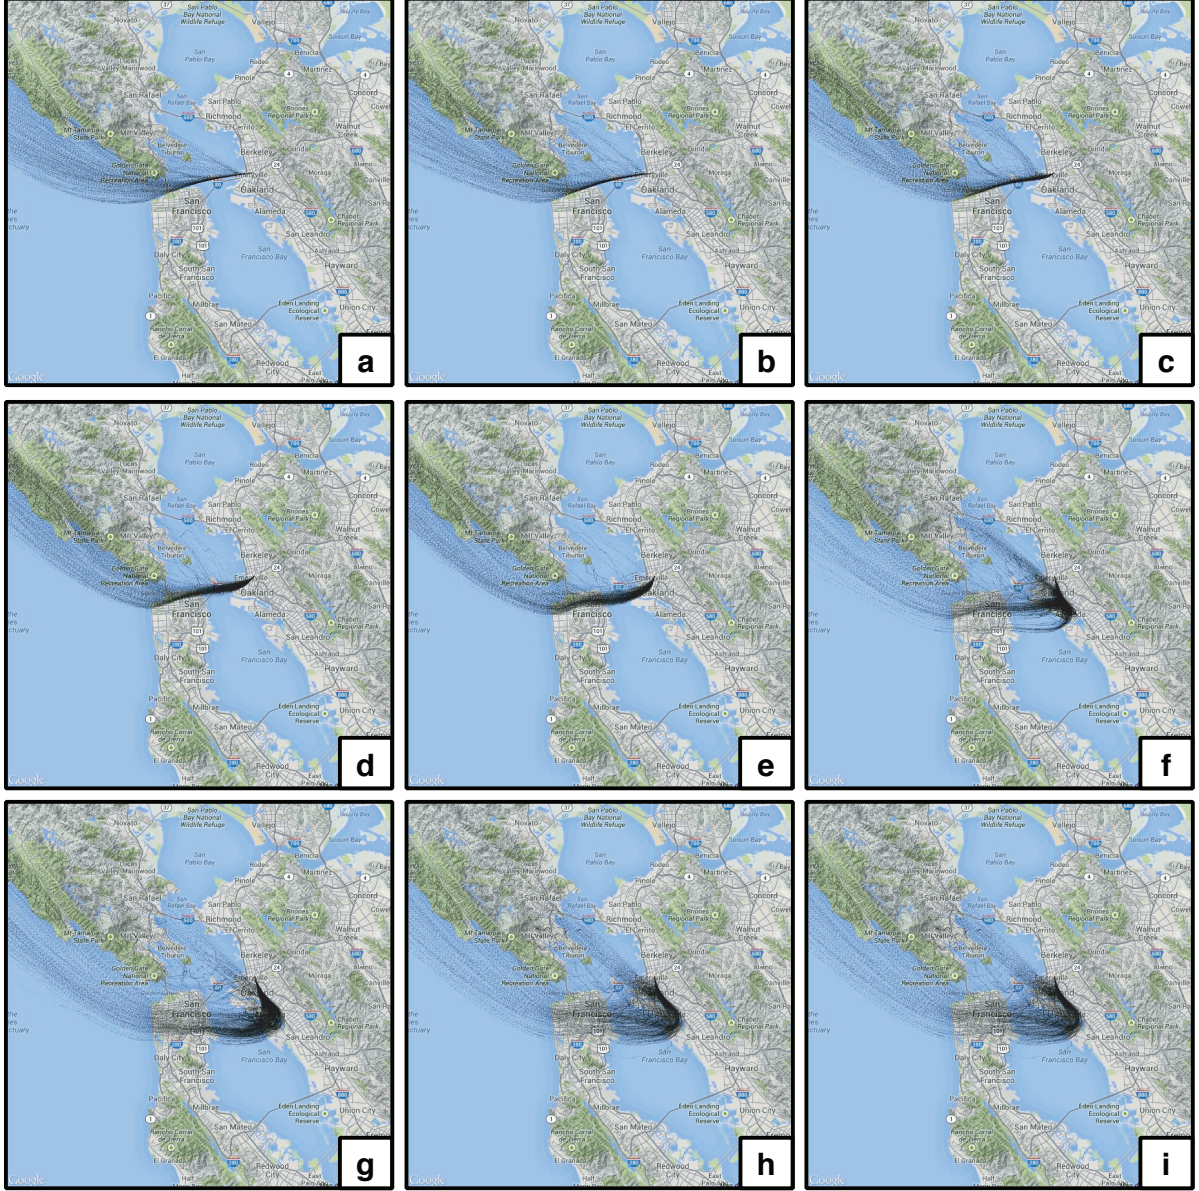

Figure 2: **STILT back trajectories.** Example back trajectories computed using WRF-STILT beginning from a BEACO<sub>2</sub>N node. Panels show different particle release times.

where  $f_\sigma$  is an uncertainty scaling factor. Here we have chosen  $f_\sigma = 1$ , corresponding to a 100% uncertainty.  $\mathbf{M}_t$  and  $\mathbf{M}_s$  are constructed as:

$$\mathbf{M}_t = \begin{pmatrix} \text{corr}(\mathbf{X}_{(:,1)}, \mathbf{X}_{(:,1)}) & \cdots & \text{corr}(\mathbf{X}_{(:,1)}, \mathbf{X}_{(:,n_t)}) \\ \vdots & \ddots & \vdots \\ \text{corr}(\mathbf{X}_{(:,n_t)}, \mathbf{X}_{(:,1)}) & \cdots & \text{corr}(\mathbf{X}_{(:,n_t)}, \mathbf{X}_{(:,n_t)}) \end{pmatrix} \circ \exp\left(-\frac{\mathbf{Z}_t}{\tau_t}\right) \quad (6)$$

$$\mathbf{M}_s = \begin{pmatrix} \text{corr}(\mathbf{X}_{(1,1,:)}, \mathbf{X}_{(1,1,:)}) & \cdots & \text{corr}(\mathbf{X}_{(1,1,:)}, \mathbf{X}_{(n_x, n_y,:)}) \\ \vdots & \ddots & \vdots \\ \text{corr}(\mathbf{X}_{(n_x, n_y,:)}, \mathbf{X}_{(1,1,:)}) & \cdots & \text{corr}(\mathbf{X}_{(n_x, n_y,:)}, \mathbf{X}_{(n_x, n_y,:)}) \end{pmatrix} \circ \exp\left(-\frac{\mathbf{Z}_s}{\tau_s}\right) \quad (7)$$

where  $\circ$  is the Hadamard product,  $\mathbf{Z}_t$  ( $n_t \times n_t$ ) and  $\mathbf{Z}_s$  ( $n_x n_y \times n_x n_y$ ) represent the separation lags/distances in between locations in time and space, respectively, and  $\tau_t$  and  $\tau_s$  are the temporal and spatial decay parameters, respectively. Here we have chosen  $\tau_t = 3$  hr and  $\tau_s = 5$  km.

The resulting correlation structure can be seen in Fig. 3. We can see that the temporal correlation matrix is diagonal with an exponential decay (Fig. 3c). The spatial structure shown in Fig. 3d and 3e is more complicated. The banded structure in panels Fig. 3d and 3e is from reshaping the state vector from matrices to a vector.

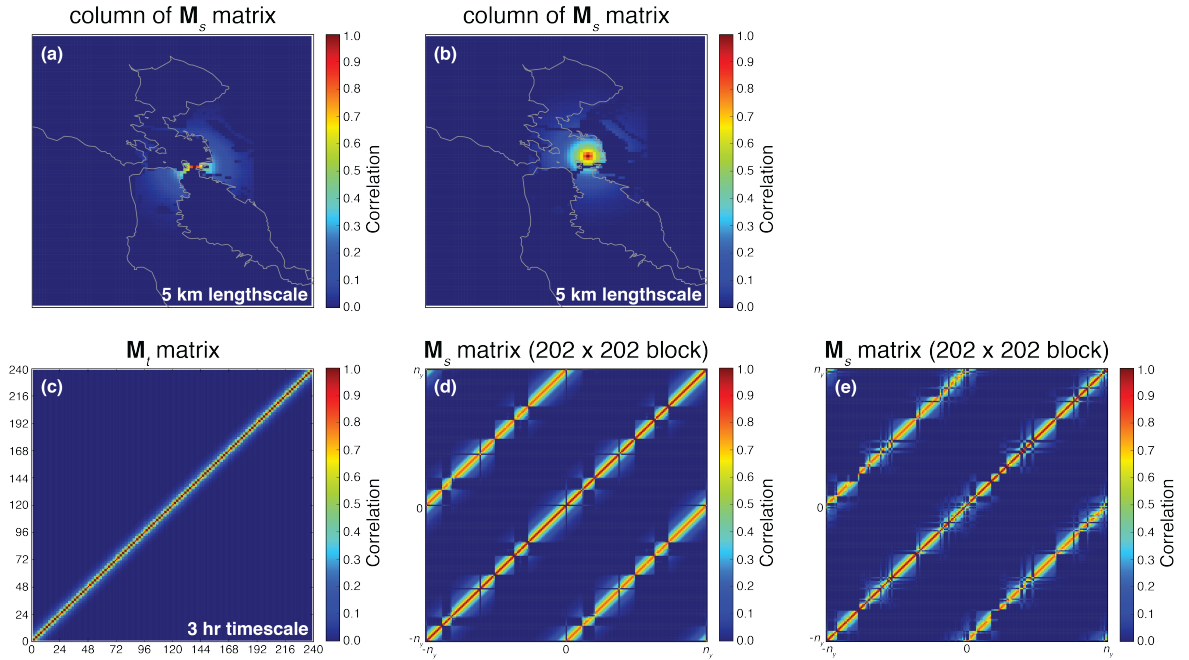

**Figure 3: Prior correlation matrix structure.** (a) A column of the spatial correlation matrix for a grid cell on a road. (b) A column of the spatial correlation matrix for a grid cell in the bay. (c) Temporal correlation matrix. (d) A 202×202 block of the spatial correlation matrix centered on the grid cell from panel (a). (e) A 202×202 block of the spatial correlation matrix showing some of the more complicated structure.  $n_y$  in panel (d) and (e) is the number of grid cells in the longitudinal direction ( $n_y = 101$ ).

Here we have used knowledge of the true emissions,  $\mathbf{X}$ , in constructing  $\mathbf{M}_t$  and  $\mathbf{M}_s$ . At first glance this would seem to be an overly optimistic specification of the prior covariance

structure. However, in practice, this is equivalent to specifying a correlation that exponentially decays over a specified land-type (e.g., roads). This is because grid cells from similar land-types have a similar diurnal cycle and will be strongly correlated with each other and have negligible correlations with other land-types. This can be seen in Fig 3a and 3b. This is similar to the “hybrid” spatial error correlation used in Basu *et al.*[8].

### 3 Implementation of the error metrics

For computing the error metric we use three third-order tensors (all dimension  $n_x \times n_y \times n_t$ ): the prior emissions ( $\mathbf{W}$ ), the true emissions ( $\mathbf{X}$ ), and the posterior emissions ( $\mathbf{Y}$ ). And evaluate them using:

$$\eta = 1 - \frac{\|\mathbf{y} - \mathbf{x}\|_2}{\|\mathbf{w} - \mathbf{x}\|_2} \quad (8)$$

where  $\mathbf{x}$ ,  $\mathbf{y}$ , and  $\mathbf{w}$  are explained for each source type below.

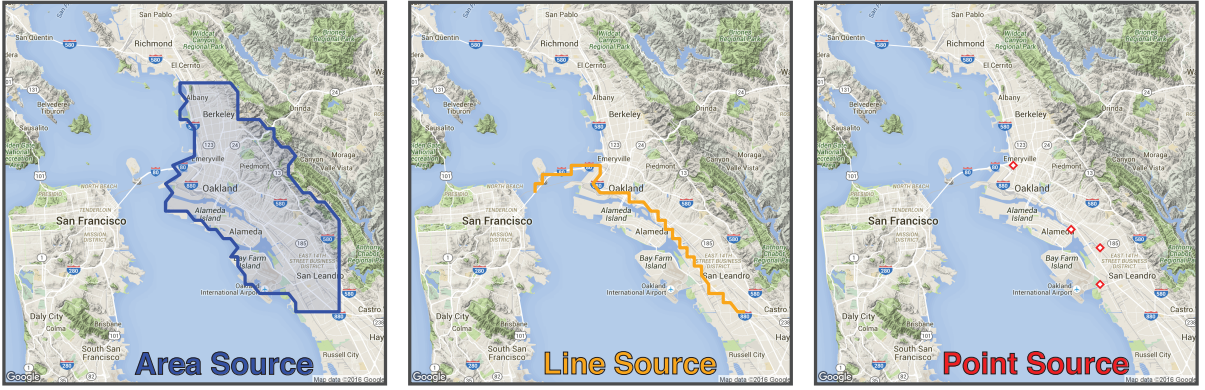

Figure 4: **Source types examined.** Same as right column from main text Fig. 3. The area source, line source, and point source have emission rates of  $147 \pm 55 \text{ tC hr}^{-1}$ ,  $45 \pm 20 \text{ tC hr}^{-1}$ , and  $9 \pm 4 \text{ tC hr}^{-1}$  over one week, respectively.

#### 3.1 Area Source

We use the area source mask ( $\mathcal{M}_{AS}$ ) shown in the left panel of Fig. 4. We sum emissions from within the mask at each timestep to create  $n_t \times 1$  vectors of emissions from the area source.  $\mathbf{x}$ ,  $\mathbf{y}$ , and  $\mathbf{w}$  are constructed as:

$$\mathbf{x} = \begin{pmatrix} \sum_{i,j \in \mathcal{M}_{AS}} \mathbf{X}(i,j,1) \\ \sum_{i,j \in \mathcal{M}_{AS}} \mathbf{X}(i,j,2) \\ \vdots \\ \sum_{i,j \in \mathcal{M}_{AS}} \mathbf{X}(i,j,n_t) \end{pmatrix}, \quad \mathbf{y} = \begin{pmatrix} \sum_{i,j \in \mathcal{M}_{AS}} \mathbf{Y}(i,j,1) \\ \sum_{i,j \in \mathcal{M}_{AS}} \mathbf{Y}(i,j,2) \\ \vdots \\ \sum_{i,j \in \mathcal{M}_{AS}} \mathbf{Y}(i,j,n_t) \end{pmatrix}, \quad \mathbf{w} = \begin{pmatrix} \sum_{i,j \in \mathcal{M}_{AS}} \mathbf{W}(i,j,1) \\ \sum_{i,j \in \mathcal{M}_{AS}} \mathbf{W}(i,j,2) \\ \vdots \\ \sum_{i,j \in \mathcal{M}_{AS}} \mathbf{W}(i,j,n_t) \end{pmatrix} \quad (9)$$

Posterior emissions are then evaluated using Eq. 8.

### 3.2 Line Source

We use the line source mask ( $\mathcal{M}_{\text{LS}}$ ) shown in the middle panel of Fig. 4. We sum emissions from within the mask at each timestep to create  $n_t \times 1$  vectors of emissions from the line source.  $\mathbf{x}$ ,  $\mathbf{y}$ , and  $\mathbf{w}$  are constructed as:

$$\mathbf{x} = \begin{pmatrix} \sum_{i,j \in \mathcal{M}_{\text{LS}}} \mathbf{X}_{(i,j,1)} \\ \sum_{i,j \in \mathcal{M}_{\text{LS}}} \mathbf{X}_{(i,j,2)} \\ \vdots \\ \sum_{i,j \in \mathcal{M}_{\text{LS}}} \mathbf{X}_{(i,j,n_t)} \end{pmatrix}, \quad \mathbf{y} = \begin{pmatrix} \sum_{i,j \in \mathcal{M}_{\text{LS}}} \mathbf{Y}_{(i,j,1)} \\ \sum_{i,j \in \mathcal{M}_{\text{LS}}} \mathbf{Y}_{(i,j,2)} \\ \vdots \\ \sum_{i,j \in \mathcal{M}_{\text{LS}}} \mathbf{Y}_{(i,j,n_t)} \end{pmatrix}, \quad \mathbf{w} = \begin{pmatrix} \sum_{i,j \in \mathcal{M}_{\text{LS}}} \mathbf{W}_{(i,j,1)} \\ \sum_{i,j \in \mathcal{M}_{\text{LS}}} \mathbf{W}_{(i,j,2)} \\ \vdots \\ \sum_{i,j \in \mathcal{M}_{\text{LS}}} \mathbf{W}_{(i,j,n_t)} \end{pmatrix} \quad (10)$$

Posterior emissions are then evaluated using Eq. 8.

### 3.3 Point Source

We use the locations of the four point sources ( $[i^{\{1\}}, \dots, i^{\{4\}}]$  and  $[j^{\{1\}}, \dots, j^{\{4\}}]$ ) shown in the right panel of Fig. 4. We extract emissions from the four point sources at each timestep to create  $4n_t \times 1$  vectors of emissions from the point sources.  $\mathbf{x}$ ,  $\mathbf{y}$ , and  $\mathbf{w}$  are constructed as:

$$\mathbf{x} = \begin{pmatrix} \mathbf{X}_{(i^{\{1\}}, j^{\{1\}}, 1)} \\ \mathbf{X}_{(i^{\{2\}}, j^{\{2\}}, 1)} \\ \mathbf{X}_{(i^{\{3\}}, j^{\{3\}}, 1)} \\ \mathbf{X}_{(i^{\{4\}}, j^{\{4\}}, 1)} \\ \vdots \\ \mathbf{X}_{(i^{\{1\}}, j^{\{1\}}, n_t)} \\ \mathbf{X}_{(i^{\{2\}}, j^{\{2\}}, n_t)} \\ \mathbf{X}_{(i^{\{3\}}, j^{\{3\}}, n_t)} \\ \mathbf{X}_{(i^{\{4\}}, j^{\{4\}}, n_t)} \end{pmatrix}, \quad \mathbf{y} = \begin{pmatrix} \mathbf{Y}_{(i^{\{1\}}, j^{\{1\}}, 1)} \\ \mathbf{Y}_{(i^{\{2\}}, j^{\{2\}}, 1)} \\ \mathbf{Y}_{(i^{\{3\}}, j^{\{3\}}, 1)} \\ \mathbf{Y}_{(i^{\{4\}}, j^{\{4\}}, 1)} \\ \vdots \\ \mathbf{Y}_{(i^{\{1\}}, j^{\{1\}}, n_t)} \\ \mathbf{Y}_{(i^{\{2\}}, j^{\{2\}}, n_t)} \\ \mathbf{Y}_{(i^{\{3\}}, j^{\{3\}}, n_t)} \\ \mathbf{Y}_{(i^{\{4\}}, j^{\{4\}}, n_t)} \end{pmatrix}, \quad \mathbf{w} = \begin{pmatrix} \mathbf{W}_{(i^{\{1\}}, j^{\{1\}}, 1)} \\ \mathbf{W}_{(i^{\{2\}}, j^{\{2\}}, 1)} \\ \mathbf{W}_{(i^{\{3\}}, j^{\{3\}}, 1)} \\ \mathbf{W}_{(i^{\{4\}}, j^{\{4\}}, 1)} \\ \vdots \\ \mathbf{W}_{(i^{\{1\}}, j^{\{1\}}, n_t)} \\ \mathbf{W}_{(i^{\{2\}}, j^{\{2\}}, n_t)} \\ \mathbf{W}_{(i^{\{3\}}, j^{\{3\}}, n_t)} \\ \mathbf{W}_{(i^{\{4\}}, j^{\{4\}}, n_t)} \end{pmatrix} \quad (11)$$

Posterior emissions are then evaluated using Eq. 8.

## 4 Relating the error metric to the flux error

We can relate our error metric ( $\eta$ ) to the flux error as:

$$\varepsilon = \underbrace{(1 - \eta)}_{\text{unexplained error}} \cdot \underbrace{\left( \frac{1}{m} \sum_{i=1}^m \mathbf{x}_i^a \right)}_{\text{mean true emissions}} \cdot \underbrace{\left( \frac{1}{m} \sum_{i=1}^m \left| \frac{\mathbf{x}_i^b - \mathbf{x}_i^a}{\mathbf{x}_i^a} \right| \right)}_{\text{mean relative difference between prior and true emissions}} \quad (12)$$

where  $\mathbf{x}^a$  is the true emissions,  $\mathbf{x}^b$  ( $m \times 1$  vector) is the prior emissions, and  $m = 2, 133, 120$ .

## 5 Sensitivity tests

We tested the sensitivity to domain-size, systematic biases, and observational frequency.





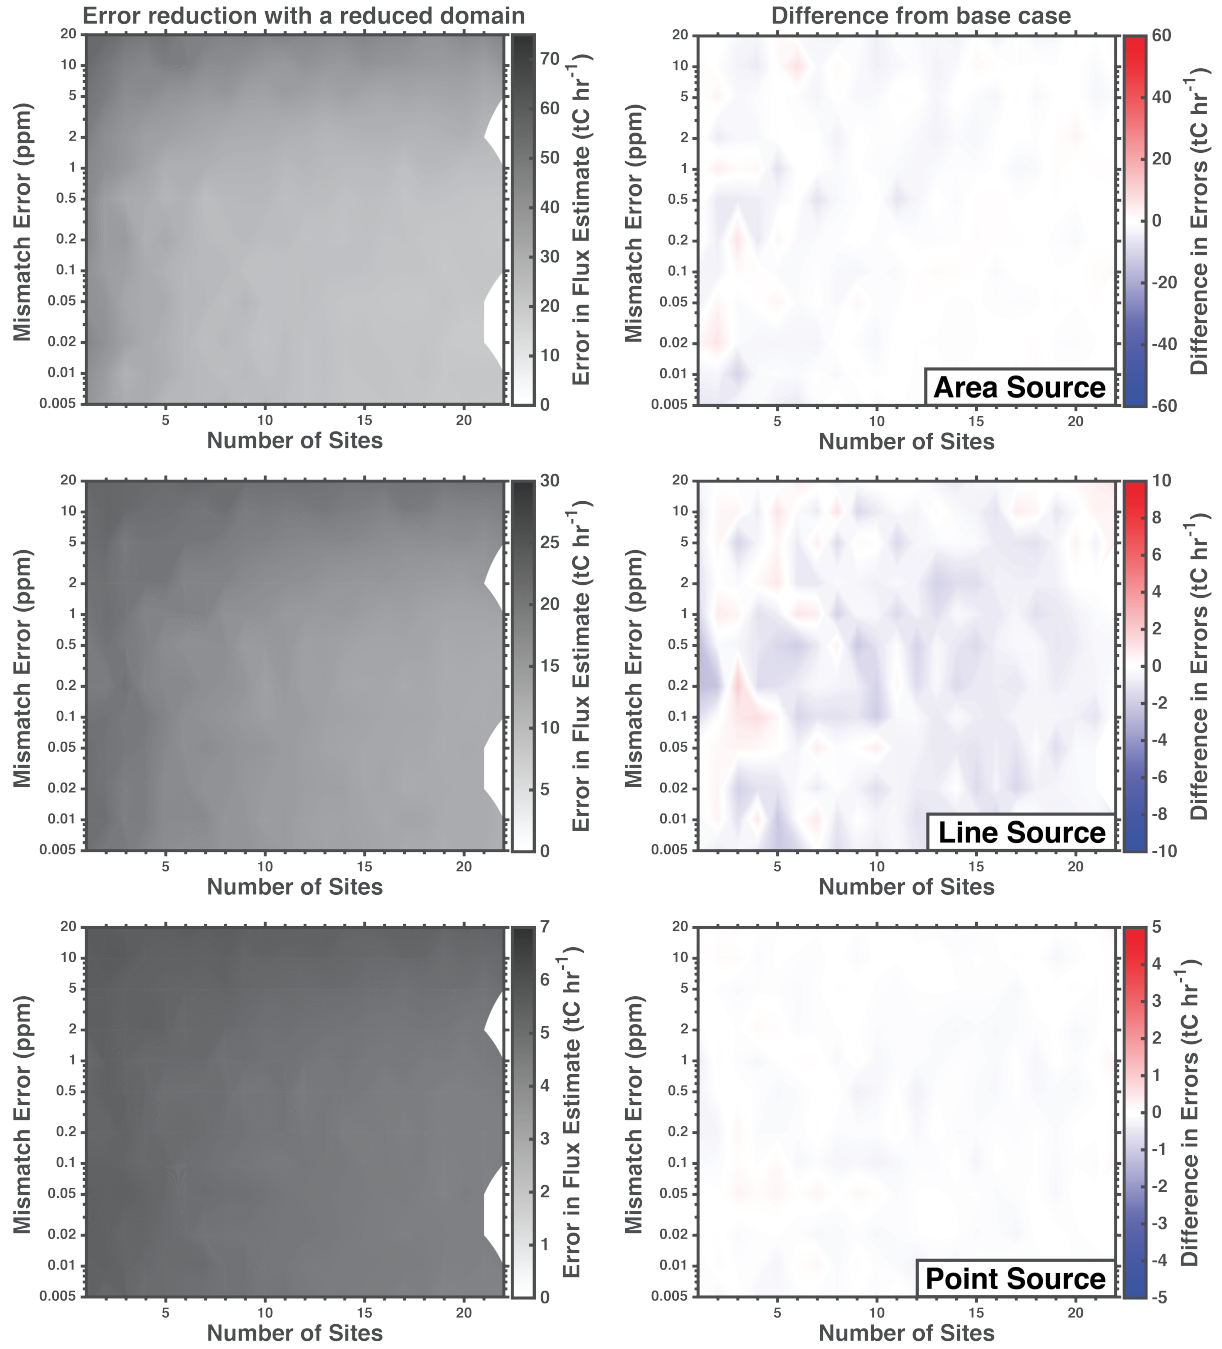

Figure 6: **Error reduction with a reduced domain.** Left column is the same as main text Fig. 3 except the inversions use the reduced domain shown in Fig. 5 and each point only uses 5 ensemble members. Right column is the difference between the left column and the base case.

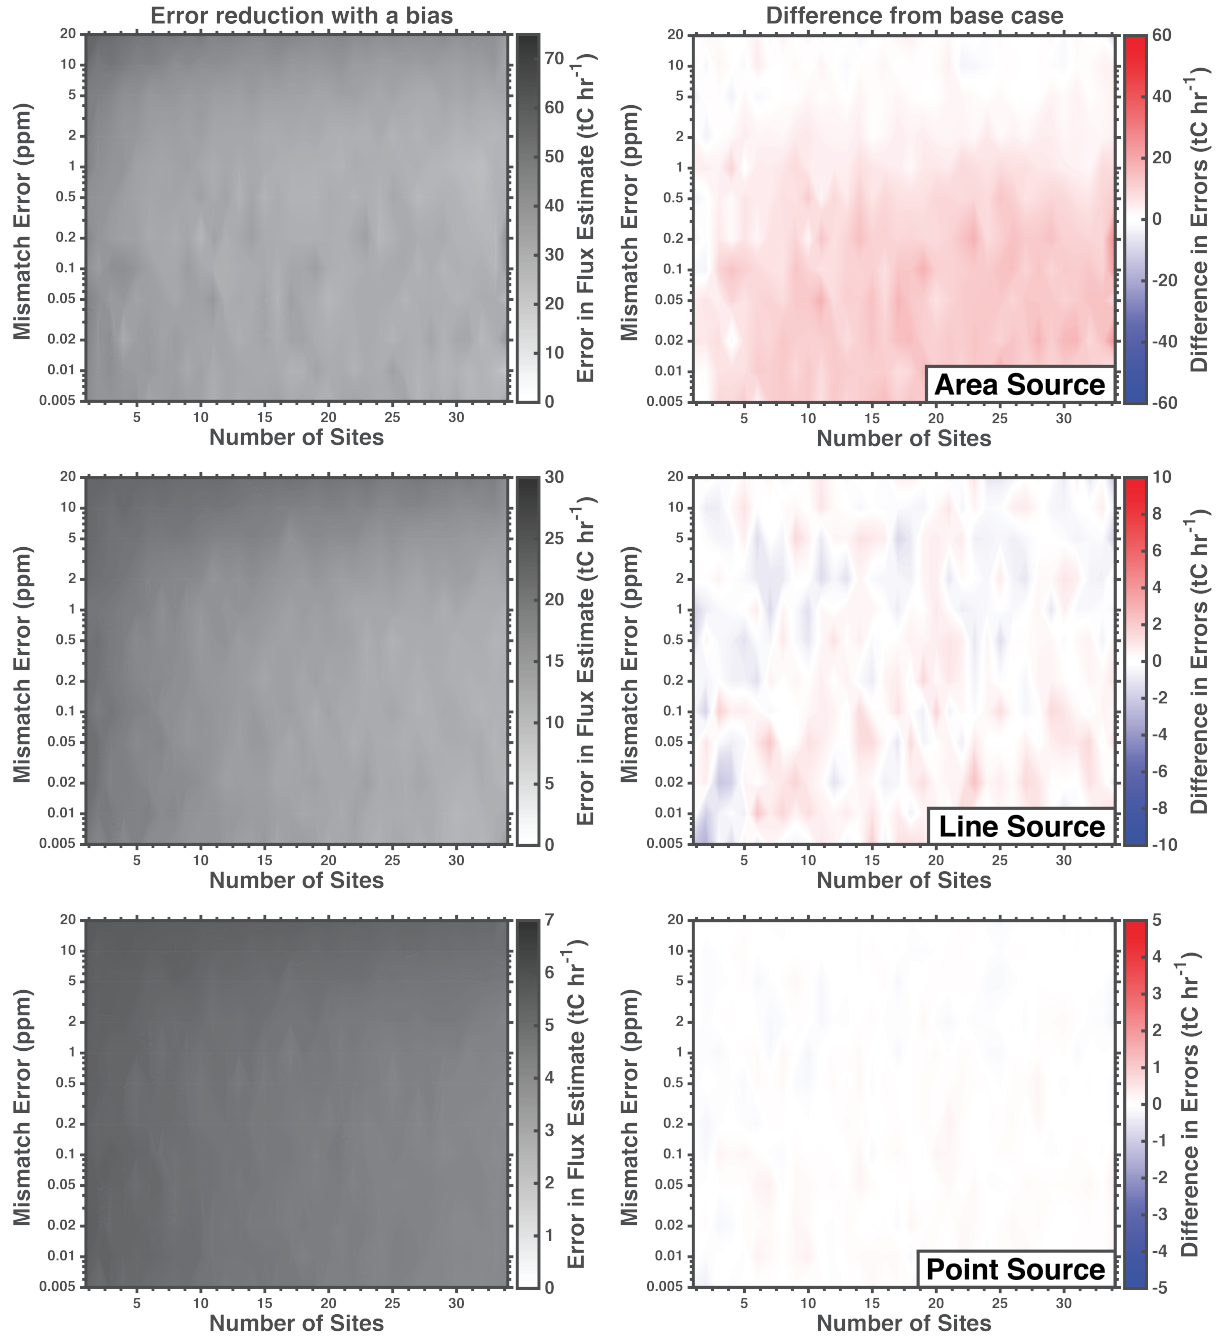

Figure 7: **Error reduction with a systematic bias.** Same as Fig. 6 but for a systematic bias ( $\epsilon_b \sim \mathcal{N}(0, \sigma_b^2)$ ) at each site.



This is partly due to the poor representation of the diurnal cycle in the prior emissions. The inversion is unable to correct for the overestimated nighttime emissions in the prior without nighttime observations.

## 6 Model selection criterion

The statistical models presented in the main text were chosen based on an analysis of 127 different models using Akaike Information Criterion (AIC), Bayesian Information Criterion (BIC), and F-tests. See Appendix A for a list of all 127 models. The selected models all have p-values less than 0.001 in the F-tests. Table 1 shows the model selection criterion for the reduced domain size and Appendix A lists of all the model selection criterion.

Table 1: Model selection criterion and regression coefficients for the base case.

| Source Type  | AIC | BIC | Model parameters<br>[Regression Coefficients]                                                                                                                        |
|--------------|-----|-----|----------------------------------------------------------------------------------------------------------------------------------------------------------------------|
| Area Source  | 382 | 406 | $\beta_0 + \beta_2\sigma_o + \beta_3 \ln(n_s) + \beta_4 \ln(\sigma_o) + \beta_5\sqrt{n_s} + \beta_6\sqrt{\sigma_o}$<br>[44.16, 0.070, 15.76, 1.23, -3.61, -14.09]    |
| Line Source  | 478 | 502 | $\beta_1 n_s + \beta_2\sigma_o + \beta_3 \ln(n_s) + \beta_4 \ln(\sigma_o) + \beta_5\sqrt{n_s} + \beta_6\sqrt{\sigma_o}$<br>[-1.44, 0.58, -7.57, 1.18, 23.49, -12.37] |
| Point Source | 513 | 533 | $\beta_0 + \beta_2\sigma_o + \beta_4 \ln(\sigma_o) + \beta_5\sqrt{n_s} + \beta_6\sqrt{\sigma_o}$<br>[6.53, 0.77, 0.81, 4.77, -8.95]                                  |

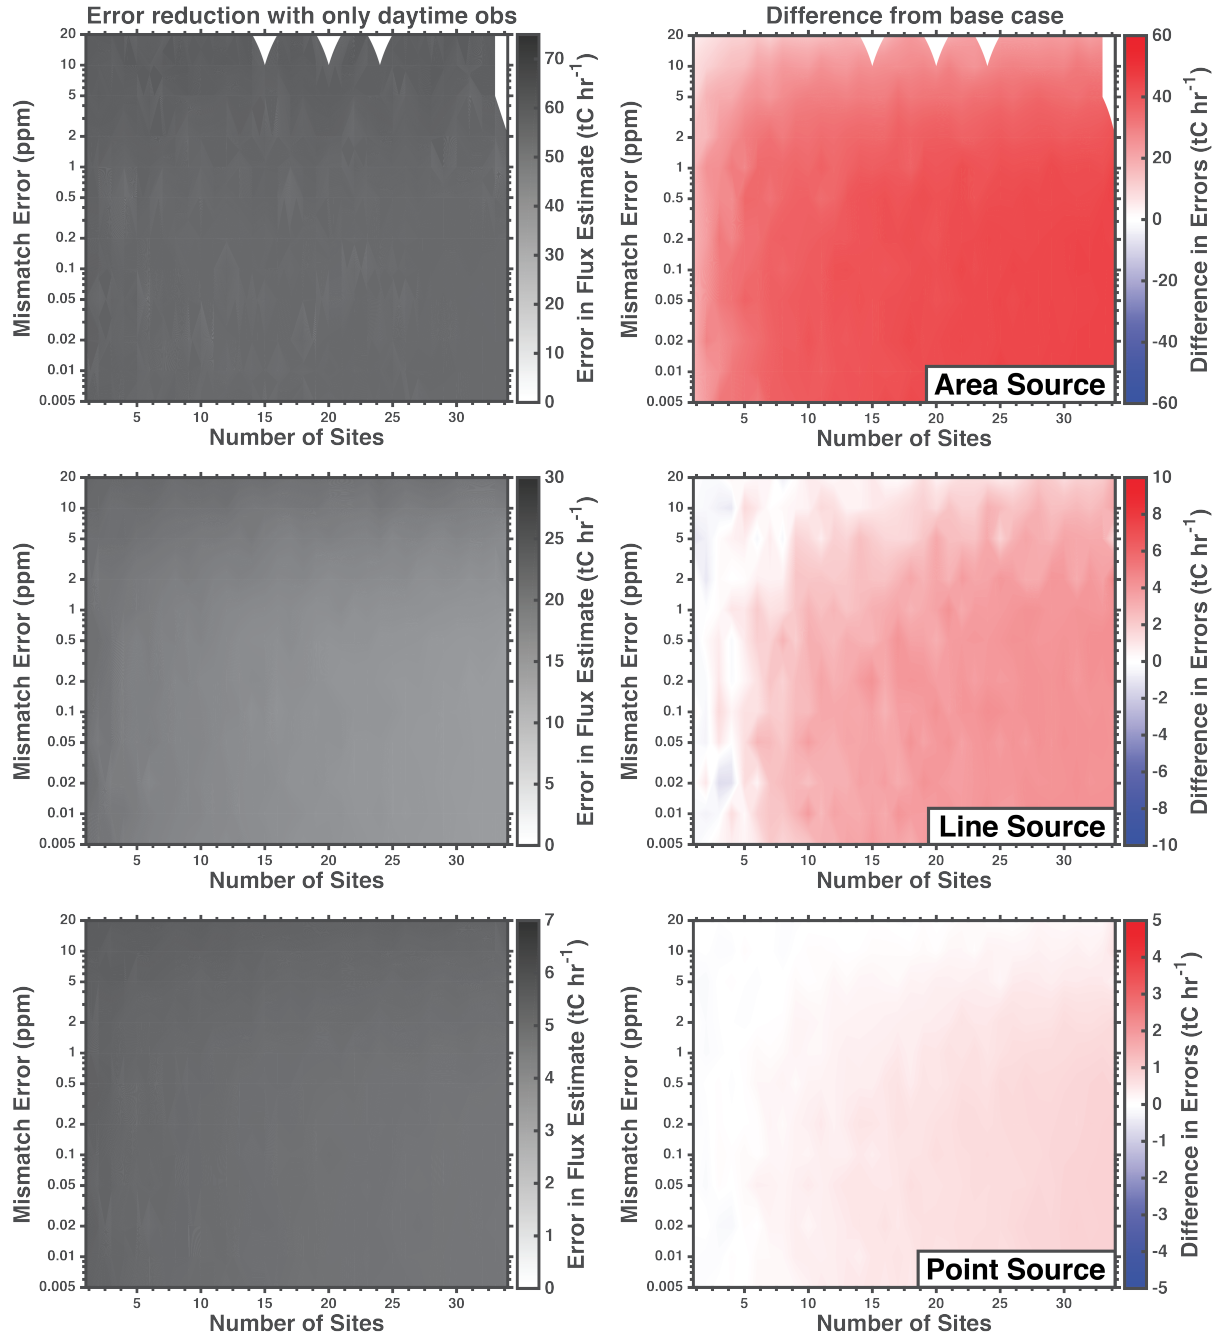

Figure 8: **Error reduction using daytime-only observations.** Same as Fig. 6 but using only daytime observations (10am to 5pm local time).

## References

- [1] Skamarock, W. C. *et al.* A description of the advanced research wrf version 3. Tech. Rep., National Center for Atmospheric Research (2008).
- [2] Lin, J. C. *et al.* A near-field tool for simulating the upstream influence of atmospheric observations: The stochastic time-inverted lagrangian transport (stilt) model. *Journal of Geophysical Research-Atmospheres* **108**, ACH 2–1–ACH 2–17 (2003).
- [3] Nehrkorn, T. *et al.* Coupled weather research and forecasting stochastic time-inverted lagrangian transport (wrf–stilt) model. *Meteorology and Atmospheric Physics* **107**, 51–64 (2010).
- [4] Mesinger, F. *et al.* North american regional reanalysis. *Bulletin of the American Meteorological Society* **87**, 343–360 (2006).
- [5] Meirink, J. F., Bergamaschi, P. & Krol, M. C. Four-dimensional variational data assimilation for inverse modelling of atmospheric methane emissions: method and comparison with synthesis inversion. *Atmospheric Chemistry and Physics* **8**, 6341–6353 (2008).
- [6] Singh, K. *et al.* Construction of non-diagonal background error covariance matrices for global chemical data assimilation. *Geoscientific Model Development* **4**, 299–316 (2011).
- [7] Yadav, V. & Michalak, A. M. Improving computational efficiency in large linear inverse problems: an example from carbon dioxide flux estimation. *Geoscientific Model Development* **6**, 583–590 (2013).
- [8] Basu, S., Miller, J. B. & Lehman, S. Separation of biospheric and fossil fuel fluxes of CO<sub>2</sub> by atmospheric inversion of CO<sub>2</sub> and <sup>14</sup>CO<sub>2</sub> measurements: Observation system simulations. *Atmospheric Chemistry and Physics Discussions* 1–34 (2016).

## A Tables of Model Selection Criterion

Listing 1 : List of all the model combinations

|          |                                                                                |
|----------|--------------------------------------------------------------------------------|
| Model 1  | = constant, nSites, obsErr, ln(nSites), ln(obsErr), sqrt(nSites), sqrt(obsErr) |
| Model 2  | = constant, nSites, obsErr, ln(nSites), ln(obsErr), sqrt(nSites)               |
| Model 3  | = constant, nSites, obsErr, ln(nSites), ln(obsErr), sqrt(obsErr)               |
| Model 4  | = constant, nSites, obsErr, ln(nSites), sqrt(nSites), sqrt(obsErr)             |
| Model 5  | = constant, nSites, obsErr, ln(obsErr), sqrt(nSites), sqrt(obsErr)             |
| Model 6  | = constant, nSites, ln(nSites), ln(obsErr), sqrt(nSites), sqrt(obsErr)         |
| Model 7  | = constant, obsErr, ln(nSites), ln(obsErr), sqrt(nSites), sqrt(obsErr)         |
| Model 8  | = nSites, obsErr, ln(nSites), ln(obsErr), sqrt(nSites), sqrt(obsErr)           |
| Model 9  | = constant, nSites, obsErr, ln(nSites), ln(obsErr)                             |
| Model 10 | = constant, nSites, obsErr, ln(nSites), sqrt(nSites)                           |
| Model 11 | = constant, nSites, obsErr, ln(obsErr), sqrt(nSites)                           |
| Model 12 | = constant, nSites, ln(nSites), ln(obsErr), sqrt(nSites)                       |
| Model 13 | = constant, obsErr, ln(nSites), ln(obsErr), sqrt(nSites)                       |
| Model 14 | = nSites, obsErr, ln(nSites), ln(obsErr), sqrt(nSites)                         |
| Model 15 | = constant, nSites, obsErr, ln(nSites), sqrt(obsErr)                           |
| Model 16 | = constant, nSites, obsErr, ln(obsErr), sqrt(obsErr)                           |
| Model 17 | = constant, nSites, ln(nSites), ln(obsErr), sqrt(obsErr)                       |
| Model 18 | = constant, obsErr, ln(nSites), ln(obsErr), sqrt(obsErr)                       |
| Model 19 | = nSites, obsErr, ln(nSites), ln(obsErr), sqrt(obsErr)                         |
| Model 20 | = constant, nSites, obsErr, sqrt(nSites), sqrt(obsErr)                         |
| Model 21 | = constant, nSites, ln(nSites), sqrt(nSites), sqrt(obsErr)                     |
| Model 22 | = constant, obsErr, ln(nSites), sqrt(nSites), sqrt(obsErr)                     |
| Model 23 | = nSites, obsErr, ln(nSites), sqrt(nSites), sqrt(obsErr)                       |
| Model 24 | = constant, nSites, ln(obsErr), sqrt(nSites), sqrt(obsErr)                     |
| Model 25 | = constant, obsErr, ln(obsErr), sqrt(nSites), sqrt(obsErr)                     |
| Model 26 | = nSites, obsErr, ln(obsErr), sqrt(nSites), sqrt(obsErr)                       |
| Model 27 | = constant, ln(nSites), ln(obsErr), sqrt(nSites), sqrt(obsErr)                 |
| Model 28 | = nSites, ln(nSites), ln(obsErr), sqrt(nSites), sqrt(obsErr)                   |
| Model 29 | = obsErr, ln(nSites), ln(obsErr), sqrt(nSites), sqrt(obsErr)                   |
| Model 30 | = constant, nSites, obsErr, ln(nSites)                                         |
| Model 31 | = constant, nSites, obsErr, ln(obsErr)                                         |
| Model 32 | = constant, nSites, obsErr, sqrt(nSites)                                       |
| Model 33 | = constant, nSites, obsErr, sqrt(obsErr)                                       |
| Model 34 | = constant, nSites, ln(nSites), ln(obsErr)                                     |
| Model 35 | = constant, nSites, ln(nSites), sqrt(nSites)                                   |
| Model 36 | = constant, nSites, ln(nSites), sqrt(obsErr)                                   |
| Model 37 | = constant, nSites, ln(obsErr), sqrt(nSites)                                   |
| Model 38 | = constant, nSites, ln(obsErr), sqrt(obsErr)                                   |
| Model 39 | = constant, nSites, sqrt(nSites), sqrt(obsErr)                                 |
| Model 40 | = constant, obsErr, ln(nSites), ln(obsErr)                                     |
| Model 41 | = constant, obsErr, ln(nSites), sqrt(nSites)                                   |
| Model 42 | = constant, obsErr, ln(nSites), sqrt(obsErr)                                   |
| Model 43 | = constant, obsErr, ln(obsErr), sqrt(nSites)                                   |
| Model 44 | = constant, obsErr, ln(obsErr), sqrt(obsErr)                                   |
| Model 45 | = constant, obsErr, sqrt(nSites), sqrt(obsErr)                                 |
| Model 46 | = constant, ln(nSites), ln(obsErr), sqrt(nSites)                               |
| Model 47 | = constant, ln(nSites), ln(obsErr), sqrt(obsErr)                               |
| Model 48 | = constant, ln(nSites), sqrt(nSites), sqrt(obsErr)                             |
| Model 49 | = constant, ln(obsErr), sqrt(nSites), sqrt(obsErr)                             |
| Model 50 | = nSites, obsErr, ln(nSites), ln(obsErr)                                       |
| Model 51 | = nSites, obsErr, ln(nSites), sqrt(nSites)                                     |

```

195 Model 52 = nSites,obsErr,ln(nSites),sqrt(obsErr)
196 Model 53 = nSites,obsErr,ln(obsErr),sqrt(nSites)
197 Model 54 = nSites,obsErr,ln(obsErr),sqrt(obsErr)
198 Model 55 = nSites,obsErr,sqrt(nSites),sqrt(obsErr)
199 Model 56 = nSites,ln(nSites),ln(obsErr),sqrt(nSites)
200 Model 57 = nSites,ln(nSites),ln(obsErr),sqrt(obsErr)
201 Model 58 = nSites,ln(nSites),sqrt(nSites),sqrt(obsErr)
202 Model 59 = nSites,ln(obsErr),sqrt(nSites),sqrt(obsErr)
203 Model 60 = obsErr,ln(nSites),ln(obsErr),sqrt(nSites)
204 Model 61 = obsErr,ln(nSites),ln(obsErr),sqrt(obsErr)
205 Model 62 = obsErr,ln(nSites),sqrt(nSites),sqrt(obsErr)
206 Model 63 = obsErr,ln(obsErr),sqrt(nSites),sqrt(obsErr)
207 Model 64 = ln(nSites),ln(obsErr),sqrt(nSites),sqrt(obsErr)
208 Model 65 = constant,nSites,obsErr
209 Model 66 = constant,nSites,ln(nSites)
210 Model 67 = constant,nSites,ln(obsErr)
211 Model 68 = constant,nSites,sqrt(nSites)
212 Model 69 = constant,nSites,sqrt(obsErr)
213 Model 70 = constant,obsErr,ln(nSites)
214 Model 71 = constant,obsErr,ln(obsErr)
215 Model 72 = constant,obsErr,sqrt(nSites)
216 Model 73 = constant,obsErr,sqrt(obsErr)
217 Model 74 = constant,ln(nSites),ln(obsErr)
218 Model 75 = constant,ln(nSites),sqrt(nSites)
219 Model 76 = constant,ln(nSites),sqrt(obsErr)
220 Model 77 = constant,ln(obsErr),sqrt(nSites)
221 Model 78 = constant,ln(obsErr),sqrt(obsErr)
222 Model 79 = constant,sqrt(nSites),sqrt(obsErr)
223 Model 80 = nSites,obsErr,ln(nSites)
224 Model 81 = nSites,obsErr,ln(obsErr)
225 Model 82 = nSites,obsErr,sqrt(nSites)
226 Model 83 = nSites,obsErr,sqrt(obsErr)
227 Model 84 = nSites,ln(nSites),ln(obsErr)
228 Model 85 = nSites,ln(nSites),sqrt(nSites)
229 Model 86 = nSites,ln(nSites),sqrt(obsErr)
230 Model 87 = nSites,ln(obsErr),sqrt(nSites)
231 Model 88 = nSites,ln(obsErr),sqrt(obsErr)
232 Model 89 = nSites,sqrt(nSites),sqrt(obsErr)
233 Model 90 = obsErr,ln(nSites),ln(obsErr)
234 Model 91 = obsErr,ln(nSites),sqrt(nSites)
235 Model 92 = obsErr,ln(nSites),sqrt(obsErr)
236 Model 93 = obsErr,ln(obsErr),sqrt(nSites)
237 Model 94 = obsErr,ln(obsErr),sqrt(obsErr)
238 Model 95 = obsErr,sqrt(nSites),sqrt(obsErr)
239 Model 96 = ln(nSites),ln(obsErr),sqrt(nSites)
240 Model 97 = ln(nSites),ln(obsErr),sqrt(obsErr)
241 Model 98 = ln(nSites),sqrt(nSites),sqrt(obsErr)
242 Model 99 = ln(obsErr),sqrt(nSites),sqrt(obsErr)
243 Model 100 = constant,nSites
244 Model 101 = constant,obsErr
245 Model 102 = constant,ln(nSites)
246 Model 103 = constant,ln(obsErr)
247 Model 104 = constant,sqrt(nSites)
248 Model 105 = constant,sqrt(obsErr)
249 Model 106 = nSites,obsErr
250 Model 107 = nSites,ln(nSites)
251 Model 108 = nSites,ln(obsErr)

```

```

252 Model 109 = nSites, sqrt(nSites)
253 Model 110 = nSites, sqrt(obsErr)
254 Model 111 = obsErr, ln(nSites)
255 Model 112 = obsErr, ln(obsErr)
256 Model 113 = obsErr, sqrt(nSites)
257 Model 114 = obsErr, sqrt(obsErr)
258 Model 115 = ln(nSites), ln(obsErr)
259 Model 116 = ln(nSites), sqrt(nSites)
260 Model 117 = ln(nSites), sqrt(obsErr)
261 Model 118 = ln(obsErr), sqrt(nSites)
262 Model 119 = ln(obsErr), sqrt(obsErr)
263 Model 120 = sqrt(nSites), sqrt(obsErr)
264 Model 121 = constant
265 Model 122 = nSites
266 Model 123 = obsErr
267 Model 124 = ln(nSites)
268 Model 125 = ln(obsErr)
269 Model 126 = sqrt(nSites)
270 Model 127 = sqrt(obsErr)
271

```

Listing 2 : Statistical models for the “Area Source” (base case)

```

272
273 *** ERROR REDUCTION MODELS ***
274 Model 001: AIC = 383.9276 & BIC = 412.0065 (7 Terms)
275 Model 002: AIC = 514.7889 & BIC = 538.8565 (6 Terms)
276 Model 003: AIC = 383.7930 & BIC = 407.8606 (6 Terms)
277 Model 004: AIC = 451.4532 & BIC = 475.5208 (6 Terms)
278 Model 005: AIC = 401.4659 & BIC = 425.5335 (6 Terms)
279 Model 006: AIC = 400.9189 & BIC = 424.9865 (6 Terms)
280 Model 007: AIC = 382.2329 & BIC = 406.3005 (6 Terms)
281 Model 008: AIC = 493.3063 & BIC = 517.3739 (6 Terms)
282 Model 009: AIC = 512.9857 & BIC = 533.0420 (5 Terms)
283 Model 010: AIC = 543.3056 & BIC = 563.3619 (5 Terms)
284 Model 011: AIC = 516.3437 & BIC = 536.4000 (5 Terms)
285 Model 012: AIC = 653.1694 & BIC = 673.2258 (5 Terms)
286 Model 013: AIC = 512.8003 & BIC = 532.8566 (5 Terms)
287 Model 014: AIC = 536.6576 & BIC = 556.7139 (5 Terms)
288 Model 015: AIC = 449.8015 & BIC = 469.8579 (5 Terms)
289 Model 016: AIC = 512.0753 & BIC = 532.1316 (5 Terms)
290 Model 017: AIC = 400.1892 & BIC = 420.2455 (5 Terms)
291 Model 018: AIC = 414.4421 & BIC = 434.4984 (5 Terms)
292 Model 019: AIC = 575.3743 & BIC = 595.4307 (5 Terms)
293 Model 020: AIC = 456.9411 & BIC = 476.9974 (5 Terms)
294 Model 021: AIC = 463.3456 & BIC = 483.4019 (5 Terms)
295 Model 022: AIC = 449.4542 & BIC = 469.5105 (5 Terms)
296 Model 023: AIC = 502.8071 & BIC = 522.8634 (5 Terms)
297 Model 024: AIC = 413.9400 & BIC = 433.9964 (5 Terms)
298 Model 025: AIC = 477.7444 & BIC = 497.8007 (5 Terms)
299 Model 026: AIC = 518.5051 & BIC = 538.5615 (5 Terms)
300 Model 027: AIC = 399.1028 & BIC = 419.1591 (5 Terms)
301 Model 028: AIC = 492.3375 & BIC = 512.3938 (5 Terms)
302 Model 029: AIC = 609.3252 & BIC = 629.3815 (5 Terms)
303 Model 030: AIC = 541.7619 & BIC = 557.8069 (4 Terms)
304 Model 031: AIC = 557.9078 & BIC = 573.9529 (4 Terms)
305 Model 032: AIC = 544.5256 & BIC = 560.5707 (4 Terms)
306 Model 033: AIC = 530.8044 & BIC = 546.8495 (4 Terms)

```

|     |            |                                           |
|-----|------------|-------------------------------------------|
| 307 | Model 034: | AIC = 651.2413 & BIC = 667.2864 (4 Terms) |
| 308 | Model 035: | AIC = 702.6344 & BIC = 718.6795 (4 Terms) |
| 309 | Model 036: | AIC = 461.5619 & BIC = 477.6070 (4 Terms) |
| 310 | Model 037: | AIC = 652.3123 & BIC = 668.3574 (4 Terms) |
| 311 | Model 038: | AIC = 512.9356 & BIC = 528.9807 (4 Terms) |
| 312 | Model 039: | AIC = 467.6673 & BIC = 483.7124 (4 Terms) |
| 313 | Model 040: | AIC = 517.6744 & BIC = 533.7194 (4 Terms) |
| 314 | Model 041: | AIC = 541.5262 & BIC = 557.5713 (4 Terms) |
| 315 | Model 042: | AIC = 465.0317 & BIC = 481.0767 (4 Terms) |
| 316 | Model 043: | AIC = 540.2055 & BIC = 556.2506 (4 Terms) |
| 317 | Model 044: | AIC = 620.0587 & BIC = 636.1038 (4 Terms) |
| 318 | Model 045: | AIC = 504.8572 & BIC = 520.9023 (4 Terms) |
| 319 | Model 046: | AIC = 651.1698 & BIC = 667.2149 (4 Terms) |
| 320 | Model 047: | AIC = 423.5506 & BIC = 439.5957 (4 Terms) |
| 321 | Model 048: | AIC = 461.3564 & BIC = 477.4015 (4 Terms) |
| 322 | Model 049: | AIC = 480.3013 & BIC = 496.3464 (4 Terms) |
| 323 | Model 050: | AIC = 579.0750 & BIC = 595.1201 (4 Terms) |
| 324 | Model 051: | AIC = 563.5195 & BIC = 579.5646 (4 Terms) |
| 325 | Model 052: | AIC = 573.5099 & BIC = 589.5549 (4 Terms) |
| 326 | Model 053: | AIC = 543.5969 & BIC = 559.6420 (4 Terms) |
| 327 | Model 054: | AIC = 773.1389 & BIC = 789.1839 (4 Terms) |
| 328 | Model 055: | AIC = 520.0060 & BIC = 536.0511 (4 Terms) |
| 329 | Model 056: | AIC = 653.3265 & BIC = 669.3716 (4 Terms) |
| 330 | Model 057: | AIC = 575.0046 & BIC = 591.0497 (4 Terms) |
| 331 | Model 058: | AIC = 507.2983 & BIC = 523.3434 (4 Terms) |
| 332 | Model 059: | AIC = 516.5122 & BIC = 532.5573 (4 Terms) |
| 333 | Model 060: | AIC = 607.6063 & BIC = 623.6514 (4 Terms) |
| 334 | Model 061: | AIC = 671.7812 & BIC = 687.8262 (4 Terms) |
| 335 | Model 062: | AIC = 610.4250 & BIC = 626.4701 (4 Terms) |
| 336 | Model 063: | AIC = 719.4930 & BIC = 735.5381 (4 Terms) |
| 337 | Model 064: | AIC = 612.5545 & BIC = 628.5996 (4 Terms) |
| 338 | Model 065: | AIC = 571.4328 & BIC = 583.4666 (3 Terms) |
| 339 | Model 066: | AIC = 701.1087 & BIC = 713.1425 (3 Terms) |
| 340 | Model 067: | AIC = 666.7837 & BIC = 678.8175 (3 Terms) |
| 341 | Model 068: | AIC = 702.2077 & BIC = 714.2415 (3 Terms) |
| 342 | Model 069: | AIC = 537.8523 & BIC = 549.8861 (3 Terms) |
| 343 | Model 070: | AIC = 542.2674 & BIC = 554.3012 (3 Terms) |
| 344 | Model 071: | AIC = 636.6359 & BIC = 648.6697 (3 Terms) |
| 345 | Model 072: | AIC = 557.6561 & BIC = 569.6899 (3 Terms) |
| 346 | Model 073: | AIC = 623.5771 & BIC = 635.6109 (3 Terms) |
| 347 | Model 074: | AIC = 653.0281 & BIC = 665.0619 (3 Terms) |
| 348 | Model 075: | AIC = 700.9487 & BIC = 712.9825 (3 Terms) |
| 349 | Model 076: | AIC = 477.6762 & BIC = 489.7100 (3 Terms) |
| 350 | Model 077: | AIC = 660.6026 & BIC = 672.6364 (3 Terms) |
| 351 | Model 078: | AIC = 619.4667 & BIC = 631.5005 (3 Terms) |
| 352 | Model 079: | AIC = 514.0512 & BIC = 526.0850 (3 Terms) |
| 353 | Model 080: | AIC = 600.1499 & BIC = 612.1837 (3 Terms) |
| 354 | Model 081: | AIC = 849.7446 & BIC = 861.7784 (3 Terms) |
| 355 | Model 082: | AIC = 570.1771 & BIC = 582.2109 (3 Terms) |
| 356 | Model 083: | AIC = 856.8198 & BIC = 868.8536 (3 Terms) |
| 357 | Model 084: | AIC = 656.1247 & BIC = 668.1585 (3 Terms) |
| 358 | Model 085: | AIC = 703.3695 & BIC = 715.4033 (3 Terms) |
| 359 | Model 086: | AIC = 573.8958 & BIC = 585.9296 (3 Terms) |
| 360 | Model 087: | AIC = 651.3495 & BIC = 663.3833 (3 Terms) |
| 361 | Model 088: | AIC = 835.8096 & BIC = 847.8434 (3 Terms) |
| 362 | Model 089: | AIC = 522.5167 & BIC = 534.5505 (3 Terms) |
| 363 | Model 090: | AIC = 680.5031 & BIC = 692.5369 (3 Terms) |

```

364 Model 091:  AIC = 624.3632 & BIC = 636.3970 (3 Terms)
365 Model 092:  AIC = 688.4205 & BIC = 700.4543 (3 Terms)
366 Model 093:  AIC = 747.4873 & BIC = 759.5211 (3 Terms)
367 Model 094:  AIC = 821.8353 & BIC = 833.8691 (3 Terms)
368 Model 095:  AIC = 754.1316 & BIC = 766.1654 (3 Terms)
369 Model 096:  AIC = 663.4622 & BIC = 675.4960 (3 Terms)
370 Model 097:  AIC = 691.6121 & BIC = 703.6459 (3 Terms)
371 Model 098:  AIC = 610.5569 & BIC = 622.5907 (3 Terms)
372 Model 099:  AIC = 753.2032 & BIC = 765.2370 (3 Terms)
373 Model 100:  AIC = 708.5702 & BIC = 716.5927 (2 Terms)
374 Model 101:  AIC = 646.6925 & BIC = 654.7150 (2 Terms)
375 Model 102:  AIC = 700.0558 & BIC = 708.0783 (2 Terms)
376 Model 103:  AIC = 697.5921 & BIC = 705.6147 (2 Terms)
377 Model 104:  AIC = 704.5057 & BIC = 712.5282 (2 Terms)
378 Model 105:  AIC = 622.8196 & BIC = 630.8422 (2 Terms)
379 Model 106:  AIC = 862.2705 & BIC = 870.2930 (2 Terms)
380 Model 107:  AIC = 704.1059 & BIC = 712.1285 (2 Terms)
381 Model 108:  AIC = 848.2829 & BIC = 856.3054 (2 Terms)
382 Model 109:  AIC = 701.3768 & BIC = 709.3994 (2 Terms)
383 Model 110:  AIC = 863.8412 & BIC = 871.8637 (2 Terms)
384 Model 111:  AIC = 686.9972 & BIC = 695.0198 (2 Terms)
385 Model 112:  AIC = 976.0873 & BIC = 984.1098 (2 Terms)
386 Model 113:  AIC = 752.7273 & BIC = 760.7498 (2 Terms)
387 Model 114:  AIC = 1054.1848 & BIC = 1062.2073 (2 Terms)
388 Model 115:  AIC = 700.4043 & BIC = 708.4268 (2 Terms)
389 Model 116:  AIC = 707.9458 & BIC = 715.9683 (2 Terms)
390 Model 117:  AIC = 691.4227 & BIC = 699.4452 (2 Terms)
391 Model 118:  AIC = 751.4122 & BIC = 759.4347 (2 Terms)
392 Model 119:  AIC = 915.2317 & BIC = 923.2542 (2 Terms)
393 Model 120:  AIC = 758.0984 & BIC = 766.1210 (2 Terms)
394 Model 121:  AIC = 738.2662 & BIC = 742.2775 (1 Terms)
395 Model 122:  AIC = 861.8462 & BIC = 865.8574 (1 Terms)
396 Model 123:  AIC = 1109.4646 & BIC = 1113.4759 (1 Terms)
397 Model 124:  AIC = 727.5389 & BIC = 731.5502 (1 Terms)
398 Model 125:  AIC = 996.5779 & BIC = 1000.5891 (1 Terms)
399 Model 126:  AIC = 768.4575 & BIC = 772.4688 (1 Terms)
400 Model 127:  AIC = 1090.7113 & BIC = 1094.7225 (1 Terms)
401
402 *** BEST ERROR REDUCTION MODELS ***
403 Model 007:  AIC = 382.2329 & BIC = 406.3005 (6 Terms)
404

```

Listing 3 : Statistical models for the “Line Source” (base case)

```

405 *** ERROR REDUCTION MODELS ***
406
407 Model 001:  AIC = 480.2421 & BIC = 508.3210 (7 Terms)
408 Model 002:  AIC = 560.6119 & BIC = 584.6795 (6 Terms)
409 Model 003:  AIC = 496.0918 & BIC = 520.1594 (6 Terms)
410 Model 004:  AIC = 515.7065 & BIC = 539.7741 (6 Terms)
411 Model 005:  AIC = 482.1347 & BIC = 506.2023 (6 Terms)
412 Model 006:  AIC = 486.0717 & BIC = 510.1393 (6 Terms)
413 Model 007:  AIC = 492.5250 & BIC = 516.5926 (6 Terms)
414 Model 008:  AIC = 478.4108 & BIC = 502.4784 (6 Terms)
415 Model 009:  AIC = 565.9010 & BIC = 585.9574 (5 Terms)
416 Model 010:  AIC = 583.8352 & BIC = 603.8916 (5 Terms)
417 Model 011:  AIC = 560.0436 & BIC = 580.0999 (5 Terms)
418 Model 012:  AIC = 718.4606 & BIC = 738.5170 (5 Terms)

```



|     |            |                                 |           |
|-----|------------|---------------------------------|-----------|
| 419 | Model 013: | AIC = 564.1466 & BIC = 584.2030 | (5 Terms) |
| 420 | Model 014: | AIC = 560.8280 & BIC = 580.8844 | (5 Terms) |
| 421 | Model 015: | AIC = 526.3957 & BIC = 546.4520 | (5 Terms) |
| 422 | Model 016: | AIC = 581.9360 & BIC = 601.9924 | (5 Terms) |
| 423 | Model 017: | AIC = 500.2958 & BIC = 520.3522 | (5 Terms) |
| 424 | Model 018: | AIC = 506.0062 & BIC = 526.0626 | (5 Terms) |
| 425 | Model 019: | AIC = 548.9225 & BIC = 568.9788 | (5 Terms) |
| 426 | Model 020: | AIC = 516.4728 & BIC = 536.5292 | (5 Terms) |
| 427 | Model 021: | AIC = 525.9726 & BIC = 546.0289 | (5 Terms) |
| 428 | Model 022: | AIC = 523.8456 & BIC = 543.9019 | (5 Terms) |
| 429 | Model 023: | AIC = 515.7351 & BIC = 535.7915 | (5 Terms) |
| 430 | Model 024: | AIC = 487.5749 & BIC = 507.6313 | (5 Terms) |
| 431 | Model 025: | AIC = 517.7705 & BIC = 537.8268 | (5 Terms) |
| 432 | Model 026: | AIC = 485.6776 & BIC = 505.7339 | (5 Terms) |
| 433 | Model 027: | AIC = 496.8794 & BIC = 516.9357 | (5 Terms) |
| 434 | Model 028: | AIC = 484.6623 & BIC = 504.7186 | (5 Terms) |
| 435 | Model 029: | AIC = 551.9587 & BIC = 572.0151 | (5 Terms) |
| 436 | Model 030: | AIC = 586.3957 & BIC = 602.4408 | (4 Terms) |
| 437 | Model 031: | AIC = 613.8148 & BIC = 629.8599 | (4 Terms) |
| 438 | Model 032: | AIC = 582.5621 & BIC = 598.6072 | (4 Terms) |
| 439 | Model 033: | AIC = 594.4882 & BIC = 610.5333 | (4 Terms) |
| 440 | Model 034: | AIC = 718.0235 & BIC = 734.0686 | (4 Terms) |
| 441 | Model 035: | AIC = 777.6872 & BIC = 793.7323 | (4 Terms) |
| 442 | Model 036: | AIC = 536.0808 & BIC = 552.1258 | (4 Terms) |
| 443 | Model 037: | AIC = 716.6368 & BIC = 732.6819 | (4 Terms) |
| 444 | Model 038: | AIC = 581.5029 & BIC = 597.5480 | (4 Terms) |
| 445 | Model 039: | AIC = 526.6675 & BIC = 542.7126 | (4 Terms) |
| 446 | Model 040: | AIC = 571.1750 & BIC = 587.2201 | (4 Terms) |
| 447 | Model 041: | AIC = 584.9829 & BIC = 601.0280 | (4 Terms) |
| 448 | Model 042: | AIC = 532.9448 & BIC = 548.9899 | (4 Terms) |
| 449 | Model 043: | AIC = 574.4002 & BIC = 590.4453 | (4 Terms) |
| 450 | Model 044: | AIC = 763.1899 & BIC = 779.2349 | (4 Terms) |
| 451 | Model 045: | AIC = 541.9903 & BIC = 558.0354 | (4 Terms) |
| 452 | Model 046: | AIC = 717.7983 & BIC = 733.8434 | (4 Terms) |
| 453 | Model 047: | AIC = 510.4146 & BIC = 526.4597 | (4 Terms) |
| 454 | Model 048: | AIC = 533.9758 & BIC = 550.0208 | (4 Terms) |
| 455 | Model 049: | AIC = 519.6370 & BIC = 535.6821 | (4 Terms) |
| 456 | Model 050: | AIC = 572.3827 & BIC = 588.4278 | (4 Terms) |
| 457 | Model 051: | AIC = 582.5060 & BIC = 598.5510 | (4 Terms) |
| 458 | Model 052: | AIC = 550.1118 & BIC = 566.1569 | (4 Terms) |
| 459 | Model 053: | AIC = 558.8609 & BIC = 574.9060 | (4 Terms) |
| 460 | Model 054: | AIC = 737.7429 & BIC = 753.7879 | (4 Terms) |
| 461 | Model 055: | AIC = 514.4740 & BIC = 530.5191 | (4 Terms) |
| 462 | Model 056: | AIC = 718.5513 & BIC = 734.5963 | (4 Terms) |
| 463 | Model 057: | AIC = 547.3428 & BIC = 563.3878 | (4 Terms) |
| 464 | Model 058: | AIC = 526.0873 & BIC = 542.1324 | (4 Terms) |
| 465 | Model 059: | AIC = 488.2187 & BIC = 504.2638 | (4 Terms) |
| 466 | Model 060: | AIC = 569.6551 & BIC = 585.7002 | (4 Terms) |
| 467 | Model 061: | AIC = 550.0599 & BIC = 566.1050 | (4 Terms) |
| 468 | Model 062: | AIC = 550.9205 & BIC = 566.9656 | (4 Terms) |
| 469 | Model 063: | AIC = 612.5479 & BIC = 628.5930 | (4 Terms) |
| 470 | Model 064: | AIC = 552.3027 & BIC = 568.3478 | (4 Terms) |
| 471 | Model 065: | AIC = 623.4304 & BIC = 635.4643 | (3 Terms) |
| 472 | Model 066: | AIC = 775.9476 & BIC = 787.9814 | (3 Terms) |
| 473 | Model 067: | AIC = 734.7450 & BIC = 746.7788 | (3 Terms) |
| 474 | Model 068: | AIC = 775.6968 & BIC = 787.7306 | (3 Terms) |
| 475 | Model 069: | AIC = 601.4104 & BIC = 613.4442 | (3 Terms) |

|     |            |                                   |           |
|-----|------------|-----------------------------------|-----------|
| 476 | Model 070: | AIC = 592.4083 & BIC = 604.4421   | (3 Terms) |
| 477 | Model 071: | AIC = 770.3294 & BIC = 782.3632   | (3 Terms) |
| 478 | Model 072: | AIC = 591.0657 & BIC = 603.0995   | (3 Terms) |
| 479 | Model 073: | AIC = 763.9131 & BIC = 775.9469   | (3 Terms) |
| 480 | Model 074: | AIC = 716.5170 & BIC = 728.5508   | (3 Terms) |
| 481 | Model 075: | AIC = 775.8328 & BIC = 787.8666   | (3 Terms) |
| 482 | Model 076: | AIC = 540.0868 & BIC = 552.1206   | (3 Terms) |
| 483 | Model 077: | AIC = 721.2484 & BIC = 733.2822   | (3 Terms) |
| 484 | Model 078: | AIC = 761.9604 & BIC = 773.9942   | (3 Terms) |
| 485 | Model 079: | AIC = 552.3054 & BIC = 564.3392   | (3 Terms) |
| 486 | Model 080: | AIC = 595.2768 & BIC = 607.3106   | (3 Terms) |
| 487 | Model 081: | AIC = 782.0989 & BIC = 794.1327   | (3 Terms) |
| 488 | Model 082: | AIC = 580.5883 & BIC = 592.6221   | (3 Terms) |
| 489 | Model 083: | AIC = 796.3904 & BIC = 808.4242   | (3 Terms) |
| 490 | Model 084: | AIC = 716.6563 & BIC = 728.6901   | (3 Terms) |
| 491 | Model 085: | AIC = 776.0825 & BIC = 788.1163   | (3 Terms) |
| 492 | Model 086: | AIC = 557.3592 & BIC = 569.3930   | (3 Terms) |
| 493 | Model 087: | AIC = 719.3387 & BIC = 731.3725   | (3 Terms) |
| 494 | Model 088: | AIC = 791.7155 & BIC = 803.7493   | (3 Terms) |
| 495 | Model 089: | AIC = 524.6716 & BIC = 536.7054   | (3 Terms) |
| 496 | Model 090: | AIC = 571.0262 & BIC = 583.0600   | (3 Terms) |
| 497 | Model 091: | AIC = 592.8115 & BIC = 604.8453   | (3 Terms) |
| 498 | Model 092: | AIC = 549.3126 & BIC = 561.3464   | (3 Terms) |
| 499 | Model 093: | AIC = 610.5513 & BIC = 622.5851   | (3 Terms) |
| 500 | Model 094: | AIC = 881.0454 & BIC = 893.0792   | (3 Terms) |
| 501 | Model 095: | AIC = 616.9590 & BIC = 628.9928   | (3 Terms) |
| 502 | Model 096: | AIC = 717.3411 & BIC = 729.3749   | (3 Terms) |
| 503 | Model 097: | AIC = 550.3268 & BIC = 562.3606   | (3 Terms) |
| 504 | Model 098: | AIC = 559.6060 & BIC = 571.6398   | (3 Terms) |
| 505 | Model 099: | AIC = 628.6530 & BIC = 640.6869   | (3 Terms) |
| 506 | Model 100: | AIC = 784.6650 & BIC = 792.6875   | (2 Terms) |
| 507 | Model 101: | AIC = 774.6424 & BIC = 782.6650   | (2 Terms) |
| 508 | Model 102: | AIC = 775.0181 & BIC = 783.0407   | (2 Terms) |
| 509 | Model 103: | AIC = 815.7513 & BIC = 823.7738   | (2 Terms) |
| 510 | Model 104: | AIC = 776.3462 & BIC = 784.3688   | (2 Terms) |
| 511 | Model 105: | AIC = 762.5123 & BIC = 770.5348   | (2 Terms) |
| 512 | Model 106: | AIC = 795.8500 & BIC = 803.8725   | (2 Terms) |
| 513 | Model 107: | AIC = 774.1385 & BIC = 782.1610   | (2 Terms) |
| 514 | Model 108: | AIC = 790.5731 & BIC = 798.5956   | (2 Terms) |
| 515 | Model 109: | AIC = 775.7453 & BIC = 783.7678   | (2 Terms) |
| 516 | Model 110: | AIC = 804.6386 & BIC = 812.6611   | (2 Terms) |
| 517 | Model 111: | AIC = 593.6120 & BIC = 601.6345   | (2 Terms) |
| 518 | Model 112: | AIC = 1034.3253 & BIC = 1042.3478 | (2 Terms) |
| 519 | Model 113: | AIC = 627.7191 & BIC = 635.7416   | (2 Terms) |
| 520 | Model 114: | AIC = 1119.4241 & BIC = 1127.4466 | (2 Terms) |
| 521 | Model 115: | AIC = 718.2423 & BIC = 726.2648   | (2 Terms) |
| 522 | Model 116: | AIC = 774.7821 & BIC = 782.8046   | (2 Terms) |
| 523 | Model 117: | AIC = 557.6296 & BIC = 565.6521   | (2 Terms) |
| 524 | Model 118: | AIC = 719.5425 & BIC = 727.5650   | (2 Terms) |
| 525 | Model 119: | AIC = 980.0107 & BIC = 988.0332   | (2 Terms) |
| 526 | Model 120: | AIC = 626.9783 & BIC = 635.0008   | (2 Terms) |
| 527 | Model 121: | AIC = 855.1810 & BIC = 859.1923   | (1 Terms) |
| 528 | Model 122: | AIC = 825.2913 & BIC = 829.3025   | (1 Terms) |
| 529 | Model 123: | AIC = 1179.9119 & BIC = 1183.9231 | (1 Terms) |
| 530 | Model 124: | AIC = 776.1363 & BIC = 780.1476   | (1 Terms) |
| 531 | Model 125: | AIC = 1056.5279 & BIC = 1060.5392 | (1 Terms) |
| 532 | Model 126: | AIC = 774.3804 & BIC = 778.3917   | (1 Terms) |

```

533 Model 127:  AIC = 1164.4041 & BIC = 1168.4154  (1 Terms)
534
535 *** BEST ERROR REDUCTION MODELS ***
536 Model 008:  AIC =  478.4108 & BIC =  502.4784 (6 Terms)
537

```

Listing 4 : Statistical models for the “Point Source” (base case)

```

538 *** ERROR REDUCTION MODELS ***
539
540 Model 001:  AIC =  516.5162 & BIC =  544.5951  (7 Terms)
541 Model 002:  AIC =  551.8963 & BIC =  575.9639  (6 Terms)
542 Model 003:  AIC =  515.9237 & BIC =  539.9913  (6 Terms)
543 Model 004:  AIC =  522.9692 & BIC =  547.0368  (6 Terms)
544 Model 005:  AIC =  514.7844 & BIC =  538.8520  (6 Terms)
545 Model 006:  AIC =  527.0333 & BIC =  551.1009  (6 Terms)
546 Model 007:  AIC =  514.5781 & BIC =  538.6457  (6 Terms)
547 Model 008:  AIC =  515.8843 & BIC =  539.9519  (6 Terms)
548 Model 009:  AIC =  550.5805 & BIC =  570.6368  (5 Terms)
549 Model 010:  AIC =  584.7050 & BIC =  604.7613  (5 Terms)
550 Model 011:  AIC =  549.9804 & BIC =  570.0367  (5 Terms)
551 Model 012:  AIC =  616.8468 & BIC =  636.9031  (5 Terms)
552 Model 013:  AIC =  549.9063 & BIC =  569.9626  (5 Terms)
553 Model 014:  AIC =  549.9839 & BIC =  570.0402  (5 Terms)
554 Model 015:  AIC =  522.1990 & BIC =  542.2554  (5 Terms)
555 Model 016:  AIC =  527.8178 & BIC =  547.8741  (5 Terms)
556 Model 017:  AIC =  526.0988 & BIC =  546.1551  (5 Terms)
557 Model 018:  AIC =  556.6633 & BIC =  576.7196  (5 Terms)
558 Model 019:  AIC =  550.0185 & BIC =  570.0749  (5 Terms)
559 Model 020:  AIC =  521.1899 & BIC =  541.2462  (5 Terms)
560 Model 021:  AIC =  525.0389 & BIC =  545.0952  (5 Terms)
561 Model 022:  AIC =  521.0206 & BIC =  541.0769  (5 Terms)
562 Model 023:  AIC =  521.1768 & BIC =  541.2331  (5 Terms)
563 Model 024:  AIC =  525.2030 & BIC =  545.2594  (5 Terms)
564 Model 025:  AIC =  513.5629 & BIC =  533.6192  (5 Terms)
565 Model 026:  AIC =  525.2375 & BIC =  545.2939  (5 Terms)
566 Model 027:  AIC =  525.0636 & BIC =  545.1199  (5 Terms)
567 Model 028:  AIC =  525.2001 & BIC =  545.2565  (5 Terms)
568 Model 029:  AIC =  531.4730 & BIC =  551.5293  (5 Terms)
569 Model 030:  AIC =  582.9480 & BIC =  598.9931  (4 Terms)
570 Model 031:  AIC =  557.8958 & BIC =  573.9409  (4 Terms)
571 Model 032:  AIC =  582.7095 & BIC =  598.7546  (4 Terms)
572 Model 033:  AIC =  533.0149 & BIC =  549.0600  (4 Terms)
573 Model 034:  AIC =  615.1222 & BIC =  631.1672  (4 Terms)
574 Model 035:  AIC =  710.2246 & BIC =  726.2697  (4 Terms)
575 Model 036:  AIC =  524.1019 & BIC =  540.1470  (4 Terms)
576 Model 037:  AIC =  614.8677 & BIC =  630.9127  (4 Terms)
577 Model 038:  AIC =  536.2373 & BIC =  552.2823  (4 Terms)
578 Model 039:  AIC =  523.2077 & BIC =  539.2528  (4 Terms)
579 Model 040:  AIC =  577.0988 & BIC =  593.1439  (4 Terms)
580 Model 041:  AIC =  582.7133 & BIC =  598.7583  (4 Terms)
581 Model 042:  AIC =  559.1296 & BIC =  575.1746  (4 Terms)
582 Model 043:  AIC =  548.3828 & BIC =  564.4279  (4 Terms)
583 Model 044:  AIC =  699.9415 & BIC =  715.9866  (4 Terms)
584 Model 045:  AIC =  519.8256 & BIC =  535.8707  (4 Terms)
585 Model 046:  AIC =  614.8487 & BIC =  630.8938  (4 Terms)
586 Model 047:  AIC =  561.3878 & BIC =  577.4328  (4 Terms)
587 Model 048:  AIC =  523.0687 & BIC =  539.1138  (4 Terms)

```

|     |            |                                           |
|-----|------------|-------------------------------------------|
| 588 | Model 049: | AIC = 523.8225 & BIC = 539.8676 (4 Terms) |
| 589 | Model 050: | AIC = 552.9248 & BIC = 568.9698 (4 Terms) |
| 590 | Model 051: | AIC = 582.7480 & BIC = 598.7930 (4 Terms) |
| 591 | Model 052: | AIC = 552.6939 & BIC = 568.7389 (4 Terms) |
| 592 | Model 053: | AIC = 547.9858 & BIC = 564.0308 (4 Terms) |
| 593 | Model 054: | AIC = 593.0397 & BIC = 609.0847 (4 Terms) |
| 594 | Model 055: | AIC = 524.3754 & BIC = 540.4205 (4 Terms) |
| 595 | Model 056: | AIC = 615.2662 & BIC = 631.3113 (4 Terms) |
| 596 | Model 057: | AIC = 548.6869 & BIC = 564.7320 (4 Terms) |
| 597 | Model 058: | AIC = 523.2165 & BIC = 539.2616 (4 Terms) |
| 598 | Model 059: | AIC = 527.0500 & BIC = 543.0951 (4 Terms) |
| 599 | Model 060: | AIC = 548.9378 & BIC = 564.9829 (4 Terms) |
| 600 | Model 061: | AIC = 563.1517 & BIC = 579.1968 (4 Terms) |
| 601 | Model 062: | AIC = 530.3237 & BIC = 546.3687 (4 Terms) |
| 602 | Model 063: | AIC = 529.4731 & BIC = 545.5181 (4 Terms) |
| 603 | Model 064: | AIC = 529.7217 & BIC = 545.7667 (4 Terms) |
| 604 | Model 065: | AIC = 586.9887 & BIC = 599.0225 (3 Terms) |
| 605 | Model 066: | AIC = 708.2312 & BIC = 720.2650 (3 Terms) |
| 606 | Model 067: | AIC = 617.9610 & BIC = 629.9948 (3 Terms) |
| 607 | Model 068: | AIC = 708.3244 & BIC = 720.3582 (3 Terms) |
| 608 | Model 069: | AIC = 534.2373 & BIC = 546.2711 (3 Terms) |
| 609 | Model 070: | AIC = 600.6050 & BIC = 612.6388 (3 Terms) |
| 610 | Model 071: | AIC = 701.6617 & BIC = 713.6955 (3 Terms) |
| 611 | Model 072: | AIC = 581.0168 & BIC = 593.0506 (3 Terms) |
| 612 | Model 073: | AIC = 698.5437 & BIC = 710.5775 (3 Terms) |
| 613 | Model 074: | AIC = 626.9277 & BIC = 638.9615 (3 Terms) |
| 614 | Model 075: | AIC = 708.3516 & BIC = 720.3854 (3 Terms) |
| 615 | Model 076: | AIC = 559.3919 & BIC = 571.4257 (3 Terms) |
| 616 | Model 077: | AIC = 612.9811 & BIC = 625.0149 (3 Terms) |
| 617 | Model 078: | AIC = 698.6054 & BIC = 710.6392 (3 Terms) |
| 618 | Model 079: | AIC = 521.8286 & BIC = 533.8624 (3 Terms) |
| 619 | Model 080: | AIC = 589.0602 & BIC = 601.0940 (3 Terms) |
| 620 | Model 081: | AIC = 605.1685 & BIC = 617.2023 (3 Terms) |
| 621 | Model 082: | AIC = 581.2101 & BIC = 593.2439 (3 Terms) |
| 622 | Model 083: | AIC = 646.1754 & BIC = 658.2092 (3 Terms) |
| 623 | Model 084: | AIC = 613.4773 & BIC = 625.5111 (3 Terms) |
| 624 | Model 085: | AIC = 708.2249 & BIC = 720.2587 (3 Terms) |
| 625 | Model 086: | AIC = 551.4370 & BIC = 563.4708 (3 Terms) |
| 626 | Model 087: | AIC = 614.7086 & BIC = 626.7424 (3 Terms) |
| 627 | Model 088: | AIC = 616.3087 & BIC = 628.3425 (3 Terms) |
| 628 | Model 089: | AIC = 525.4738 & BIC = 537.5076 (3 Terms) |
| 629 | Model 090: | AIC = 577.0755 & BIC = 589.1093 (3 Terms) |
| 630 | Model 091: | AIC = 581.1069 & BIC = 593.1407 (3 Terms) |
| 631 | Model 092: | AIC = 561.2581 & BIC = 573.2919 (3 Terms) |
| 632 | Model 093: | AIC = 548.0945 & BIC = 560.1283 (3 Terms) |
| 633 | Model 094: | AIC = 736.4775 & BIC = 748.5113 (3 Terms) |
| 634 | Model 095: | AIC = 528.3875 & BIC = 540.4213 (3 Terms) |
| 635 | Model 096: | AIC = 623.2711 & BIC = 635.3049 (3 Terms) |
| 636 | Model 097: | AIC = 561.6428 & BIC = 573.6766 (3 Terms) |
| 637 | Model 098: | AIC = 530.0829 & BIC = 542.1167 (3 Terms) |
| 638 | Model 099: | AIC = 527.7309 & BIC = 539.7647 (3 Terms) |
| 639 | Model 100: | AIC = 708.1997 & BIC = 716.2222 (2 Terms) |
| 640 | Model 101: | AIC = 705.5771 & BIC = 713.5996 (2 Terms) |
| 641 | Model 102: | AIC = 711.1265 & BIC = 719.1491 (2 Terms) |
| 642 | Model 103: | AIC = 718.0927 & BIC = 726.1152 (2 Terms) |
| 643 | Model 104: | AIC = 706.3602 & BIC = 714.3827 (2 Terms) |
| 644 | Model 105: | AIC = 696.6394 & BIC = 704.6620 (2 Terms) |

```

645 Model 106:  AIC =  646.1805 & BIC =  654.2030  (2 Terms)
646 Model 107:  AIC =  706.3013 & BIC =  714.3238  (2 Terms)
647 Model 108:  AIC =  622.7828 & BIC =  630.8054  (2 Terms)
648 Model 109:  AIC =  706.8500 & BIC =  714.8726  (2 Terms)
649 Model 110:  AIC =  646.2357 & BIC =  654.2582  (2 Terms)
650 Model 111:  AIC =  598.6085 & BIC =  606.6310  (2 Terms)
651 Model 112:  AIC =  829.4327 & BIC =  837.4552  (2 Terms)
652 Model 113:  AIC =  579.2348 & BIC =  587.2573  (2 Terms)
653 Model 114:  AIC =  860.6207 & BIC =  868.6433  (2 Terms)
654 Model 115:  AIC =  636.4907 & BIC =  644.5133  (2 Terms)
655 Model 116:  AIC =  709.6320 & BIC =  717.6546  (2 Terms)
656 Model 117:  AIC =  560.5322 & BIC =  568.5547  (2 Terms)
657 Model 118:  AIC =  623.5570 & BIC =  631.5795  (2 Terms)
658 Model 119:  AIC =  791.1095 & BIC =  799.1321  (2 Terms)
659 Model 120:  AIC =  528.1109 & BIC =  536.1335  (2 Terms)
660 Model 121:  AIC =  760.9363 & BIC =  764.9476  (1 Terms)
661 Model 122:  AIC =  709.9145 & BIC =  713.9258  (1 Terms)
662 Model 123:  AIC =  898.2527 & BIC =  902.2639  (1 Terms)
663 Model 124:  AIC =  713.2731 & BIC =  717.2844  (1 Terms)
664 Model 125:  AIC =  861.0349 & BIC =  865.0461  (1 Terms)
665 Model 126:  AIC =  708.2118 & BIC =  712.2231  (1 Terms)
666 Model 127:  AIC =  890.1085 & BIC =  894.1198  (1 Terms)
667
668 *** BEST ERROR REDUCTION MODELS ***
669 Model 025:  AIC =  513.5629 & BIC =  533.6192  (5 Terms)
670

```
